# Supplementary material
Source: PubMed Central journal article supplement (PMC5383381)
Supplement: CJN.05650516SupplementaryData.pdf [file CJN.05650516SupplementaryData.pdf]

Supplemental material is neither peer-reviewed nor thoroughly edited by CJASN. The authors alone are responsible for the accuracy and presentation of the material.

**Table S1. List of cases**

| Case        | GA<br>( $\times 10^4 \mu\text{m}^2$ ) | GV<br>( $\times 10^6 \mu\text{m}^3$ ) | cortical area<br>( $\text{mm}^2$ ) | glomerulus<br>(number) | GS<br>(number) | GD1<br>(/ $\text{mm}^2$ ) | GD2<br>(/ $\text{mm}^2$ ) |
|-------------|---------------------------------------|---------------------------------------|------------------------------------|------------------------|----------------|---------------------------|---------------------------|
| NBW-MCNS 1  | 1.22                                  | 1.7                                   | 5.06                               | 18                     | 0              | 3.56                      | 3.56                      |
| NBW-MCNS 2  | 1.42                                  | 2.1                                   | 8.90                               | 32                     | 0              | 3.60                      | 3.60                      |
| NBW-MCNS 3  | 0.76                                  | 0.8                                   | 9.87                               | 58                     | 0              | 5.88                      | 5.88                      |
| NBW-MCNS 4  | 0.9,2                                 | 1.1                                   | 12.56                              | 49                     | 0              | 3.90                      | 3.90                      |
| NBW-MCNS 5  | 1.31                                  | 1.8                                   | 6.55                               | 24                     | 0              | 3.66                      | 3.66                      |
| NBW-MCNS 6  | 1.52                                  | 2.3                                   | 6.43                               | 25                     | 0              | 3.89                      | 3.89                      |
| NBW-MCNS 7  | 0.96                                  | 1.2                                   | 3.52                               | 12                     | 0              | 3.41                      | 3.41                      |
| NBW-MCNS 8  | 0.93                                  | 1.1                                   | 6.19                               | 25                     | 0              | 4.04                      | 4.04                      |
| NBW-MCNS 9  | 1.06                                  | 1.4                                   | 6.89                               | 36                     | 0              | 5.22                      | 5.22                      |
| NBW-MCNS 10 | 1.01                                  | 1.3                                   | 14.80                              | 46                     | 0              | 3.11                      | 3.11                      |
| NBW-MCNS 11 | 1.21                                  | 1.7                                   | 13.04                              | 36                     | 0              | 2.76                      | 2.76                      |
| NBW-MCNS 12 | 1.31                                  | 1.9                                   | 6.65                               | 15                     | 0              | 2.26                      | 2.26                      |
| NBW-MCNS 13 | 0.88                                  | 1.0                                   | 5.50                               | 10                     | 0              | 1.82                      | 1.82                      |
| LBW-FSGS 1  | 2.54                                  | 5.1                                   | 11.85                              | 21                     | 1              | 1.69                      | 1.77                      |
| LBW-FSGS 2  | 2.39                                  | 4.6                                   | 16.86                              | 26                     | 2              | 1.42                      | 1.54                      |
| LBW-FSGS 3  | 2.62                                  | 5.3                                   | 6.75                               | 9                      | 0              | 1.33                      | 1.33                      |
| LBW-FSGS 4  | 1.61                                  | 2.6                                   | 15.11                              | 31                     | 0              | 2.05                      | 2.05                      |
| LBW-FSGS 5  | 1.97                                  | 3.5                                   | 8.22                               | 8                      | 0              | 0.97                      | 0.97                      |
| LBW-FSGS 6  | 1.85                                  | 3.2                                   | 9.18                               | 18                     | 0              | 1.96                      | 1.96                      |
| LBW-FSGS 7  | 3.14                                  | 7.0                                   | 4.26                               | 1                      | 0              | 0.23                      | 0.23                      |
| LBW-FSGS 8  | 1.71                                  | 2.8                                   | 8.30                               | 13                     | 0              | 1.57                      | 1.57                      |
| NBW-FSGS 1  | 1.39                                  | 2.1                                   | 10.99                              | 17                     | 2              | 1.36                      | 1.55                      |
| NBW-FSGS 2  | 1.45                                  | 2.2                                   | 9.33                               | 34                     | 0              | 3.64                      | 3.64                      |

Supplemental material is neither peer-reviewed nor thoroughly edited by CJASN. The authors alone are responsible for the accuracy and presentation of the material.

|             |      |     |       |    |   |      |      |
|-------------|------|-----|-------|----|---|------|------|
| NBW-FSGS 3  | 1.14 | 1.5 | 9.09  | 22 | 1 | 2.31 | 2.42 |
| NBW-FSGS 4  | 1.67 | 2.7 | 6.54  | 21 | 0 | 3.21 | 3.21 |
| NBW-FSGS 5  | 1.19 | 1.6 | 6.00  | 27 | 1 | 4.33 | 4.50 |
| NBW-FSGS 6  | 1.10 | 1.5 | 4.56  | 22 | 0 | 4.82 | 4.82 |
| NBW-FSGS 7  | 1.62 | 2.6 | 6.50  | 23 | 1 | 3.38 | 3.54 |
| NBW-FSGS 8  | 1.12 | 1.5 | 5.55  | 22 | 0 | 3.96 | 3.96 |
| NBW-FSGS 9  | 1.10 | 1.4 | 7.37  | 33 | 0 | 4.48 | 4.48 |
| NBW-FSGS 10 | 0.87 | 1.0 | 11.27 | 24 | 4 | 1.77 | 2.13 |

GA; glomerular area, GV; glomerular volume, GS; globally sclerotic glomeruli, GD1; GD excluding globally sclerotic glomeruli, GD2;GD including globally sclerotic glomeruli, LBW-FSGS; low birth weight-focal segmental glomerulosclerosis, NBW-FSGS; normal birth weight-focal segmental glomerulosclerosis, NBW-MCNS; normal birth weight-minimal change nephrotic syndrome
